# Supplementary material for: Ehrlichia chaffeensis and E. canis hypothetical protein immunoanalysis reveals small secreted immunodominant proteins and conformation-dependent antibody epitopes
Source: PubMed Central journal article supplement (PMC7486380; doi:10.1038/s41541-020-00231-1), 2020-09-11
Supplement: 41541_2020_231_MOESM1_ESM.pdf [file 41541_2020_231_MOESM1_ESM.pdf]

**Supplementary Table 1.** Highly antigenic *E. ch.* hypothetical proteins (n=93) by ANTIGENpro (score  $\geq 0.695$ ).

| No. | Ech_ tag no. | Antigenicity score | Mean ELISA OD | Size (AA) | <i>E.ca.</i> ortholog (Ecaj_ tag no.) |
|-----|--------------|--------------------|---------------|-----------|---------------------------------------|
| 1   | 0187         | 0.969              | 0.06          | 563       | 0126                                  |
| 2   | 1147         | 0.964              | 0.05          | 126       | *                                     |
| 3   | 0247         | 0.958              | 0.05          | 302       | *                                     |
| 4   | 0261         | 0.956              | 1.08          | 264       | 0762                                  |
| 5   | 0255         | 0.950              | 0.89          | 338       | 0764                                  |
| 6   | 0253         | 0.950              | 0.01          | 189       | *                                     |
| 7   | 0865         | 0.949              | 0.04          | 302       | 0229                                  |
| 8   | 1152         | 0.949              | 0.04          | 185       | 0923                                  |
| 9   | 0722         | 0.945              | 0.41          | 190       | *                                     |
| 10  | 0246         | 0.944              | 0.03          | 275       | *                                     |
| 11  | 0257         | 0.943              | 0.02          | 226       | *                                     |
| 12  | 0609         | 0.935              | 0.01          | 301       | *                                     |
| 13  | 0601         | 0.929              | 0.00          | 374       | 0434                                  |
| 14  | 0535         | 0.928              | 0.20          | 186       | 0500                                  |
| 15  | 0251         | 0.928              | 0.41          | 205       | *                                     |
| 16  | 0576         | 0.924              | 0.04          | 98        | 0462                                  |
| 17  | 0150         | 0.923              | 0.05          | 672       | 0099                                  |
| 18  | 1037         | 0.920              | 0.02          | 1231      | 0835                                  |
| 19  | 0745         | 0.920              | 0.21          | 118       | 0324                                  |
| 20  | 0864         | 0.918              | 0.13          | 330       | 0231                                  |
| 21  | 0825         | 0.917              | 0.52          | 380       | 0259                                  |
| 22  | 0113         | 0.909              | 0.03          | 793       | *                                     |
| 23  | 0166         | 0.908              | 0.50          | 285       | 0109                                  |
| 24  | 0862         | 0.907              | 0.00          | 403       | 0232                                  |
| 25  | 0531         | 0.905              | 0.42          | 175       | *                                     |
| 26  | 0285         | 0.895              | 0.20          | 181       | *                                     |
| 27  | 0744         | 0.889              | 0.06          | 157       | 0325                                  |
| 28  | 0612         | 0.888              | 0.00          | 208       | *                                     |
| 29  | 0879         | 0.885              | 0.03          | 815       | *                                     |
| 30  | 0147         | 0.885              | 0.47          | 193       | 0096                                  |
| 31  | 0611         | 0.880              | 0.19          | 229       | 0428                                  |
| 32  | 1036         | 0.880              | 0.04          | 750       | 0834                                  |
| 33  | 0525         | 0.879              | 0.01          | 666       | 0508                                  |
| 34  | 0252         | 0.875              | 0.61          | 364       | *                                     |
| 35  | 0118         | 0.873              | 0.00          | 30        | *                                     |
| 36  | 0807         | 0.864              | 0.05          | 334       | 0271                                  |
| 37  | 0348         | 0.862              | 0.12          | 202       | 0660                                  |
| 38  | 0763         | 0.860              | 0.33          | 165       | 0312                                  |
| 39  | 0106         | 0.858              | 0.00          | 713       | 0066                                  |
| 40  | 1154         | 0.857              | 0.14          | 135       | 0926                                  |

|    |      |       |      |      |           |
|----|------|-------|------|------|-----------|
| 41 | 0120 | 0.857 | 0.00 | 213  | *         |
| 42 | 0240 | 0.857 | 0.31 | 158  | *         |
| 43 | 1148 | 0.854 | 0.21 | 142  | 0920      |
| 44 | 0243 | 0.853 | 0.02 | 293  | *         |
| 45 | 0284 | 0.852 | 0.03 | 1016 | 0716      |
| 46 | 0115 | 0.851 | 0.00 | 203  | *         |
| 47 | 0345 | 0.850 | 0.36 | 294  | 0663      |
| 48 | 0878 | 0.847 | 0.00 | 409  | *         |
| 49 | 1021 | 0.845 | 0.02 | 219  | 0824      |
| 50 | 0700 | 0.845 | 0.15 | 192  | *         |
| 51 | 0607 | 0.844 | 0.31 | 322  | 0434      |
| 52 | 0377 | 0.843 | 0.02 | 104  | 0636      |
| 53 | 0549 | 0.842 | 0.15 | 195  | *         |
| 54 | 0614 | 0.839 | 0.54 | 231  | 0423      |
| 55 | 1103 | 0.830 | 0.26 | 223  | 0881      |
| 56 | 0846 | 0.828 | 0.48 | 171  | 0242      |
| 57 | 0199 | 0.823 | 0.00 | 213  | 0136      |
| 58 | 0108 | 0.819 | 0.01 | 825  | 0072/0071 |
| 59 | 0551 | 0.811 | 0.17 | 191  | 0479      |
| 60 | 1027 | 0.804 | 0.00 | 34   | *         |
| 61 | 0663 | 0.802 | 0.14 | 202  | 0379      |
| 62 | 0578 | 0.798 | 0.37 | 185  | *         |
| 63 | 0716 | 0.790 | 0.64 | 367  | 0347      |
| 64 | 0778 | 0.786 | 0.15 | 1132 | 0297      |
| 65 | 1013 | 0.785 | 0.06 | 203  | 0818      |
| 66 | 0398 | 0.781 | 0.41 | 121  | 0621      |
| 67 | 0991 | 0.779 | 0.70 | 710  | 0139      |
| 68 | 0927 | 0.775 | 0.02 | 34   | *         |
| 69 | 0949 | 0.773 | 0.21 | 31   | *         |
| 70 | 0259 | 0.773 | 0.36 | 118  | *         |
| 71 | 0704 | 0.771 | 0.35 | 248  | 0351      |
| 72 | 0256 | 0.770 | 0.01 | 72   | *         |
| 73 | 0181 | 0.769 | 0.15 | 103  | 0122      |
| 74 | 0297 | 0.769 | 0.07 | 272  | 0706      |
| 75 | 0388 | 0.768 | 0.71 | 293  | *         |
| 76 | 0159 | 0.767 | 0.50 | 507  | 0104      |
| 77 | 1053 | 0.763 | 0.61 | 193  | 0846      |
| 78 | 0122 | 0.758 | 0.10 | 126  | 0073      |
| 79 | 0593 | 0.758 | 0.10 | 382  | 0445      |
| 80 | 0698 | 0.758 | 0.01 | 200  | *         |
| 81 | 0079 | 0.756 | 0.01 | 134  | 0047      |
| 82 | 0986 | 0.752 | 0.16 | 179  | 0142      |
| 83 | 0715 | 0.748 | 0.14 | 551  | 0348      |

|    |      |       |      |      |      |
|----|------|-------|------|------|------|
| 84 | 0279 | 0.747 | 0.01 | 41   | *    |
| 85 | 0836 | 0.737 | 0.13 | 1201 | 0253 |
| 86 | 0281 | 0.716 | 0.39 | 179  | *    |
| 87 | 0276 | 0.716 | 0.06 | 184  | *    |
| 88 | 0526 | 0.715 | 0.07 | 495  | 0507 |
| 89 | 0478 | 0.704 | 0.29 | 172  | 0548 |
| 90 | 0126 | 0.704 | 0.04 | 334  | 0077 |
| 91 | 0866 | 0.703 | 0.06 | 330  | 0228 |
| 92 | 0945 | 0.699 | 0.00 | 1349 | 0174 |
| 93 | 0767 | 0.695 | 0.02 | 621  | 0309 |

---

\* *E.ca.* ortholog not identified.

**Supplementary Table 2.** Highly antigenic *E. ca.* hypothetical proteins (n=98) by ANTIGENpro (score  $\geq 0.710$ ).

| No. | Ecaj_ tag no. | Antigenicity score | Mean ELISA OD | Size (AA) | <i>E.ch.</i> ortholog (Ech_ tag no.) |
|-----|---------------|--------------------|---------------|-----------|--------------------------------------|
| 1   | 0126          | 0.962              | 2.23          | 671       | 0187                                 |
| 2   | 0341          | 0.951              | 0.16          | 190       | *                                    |
| 3   | 0920          | 0.947              | 0.90          | 182       | 1148                                 |
| 4   | 0715          | 0.945              | 0.06          | 1918      | *                                    |
| 5   | 0099          | 0.945              | 0.02          | 630       | 0150                                 |
| 6   | 0923          | 0.942              | 0.27          | 184       | 1152                                 |
| 7   | 0063          | 0.940              | 0.10          | 705       | *                                    |
| 8   | 0762          | 0.940              | 0.01          | 353       | 0261                                 |
| 9   | 0503          | 0.939              | 0.19          | 110       | *                                    |
| 10  | 0069          | 0.938              | 0.04          | 823       | *                                    |
| 11  | 0838          | 0.932              | 0.06          | 1510      | 1038                                 |
| 12  | 0431          | 0.929              | 0.03          | 436       | *                                    |
| 13  | 0259          | 0.928              | 1.75          | 368       | 0825                                 |
| 14  | 0346          | 0.926              | 0.01          | 518       | *                                    |
| 15  | 0071          | 0.925              | 0.51          | 641       | 0121                                 |
| 16  | 0500          | 0.925              | 0.00          | 185       | 0535                                 |
| 17  | 0716          | 0.925              | 0.15          | 1601      | 0284                                 |
| 18  | 0324          | 0.922              | 0.00          | 117       | 0745                                 |
| 19  | 0922          | 0.920              | 1.56          | 133       | *                                    |
| 20  | 0067          | 0.919              | 0.00          | 695       | *                                    |
| 21  | 0764          | 0.919              | 0.01          | 191       | 0255                                 |
| 22  | 0660          | 0.917              | 0.05          | 197       | 0348                                 |
| 23  | 0139          | 0.915              | 0.07          | 794       | 0991                                 |
| 24  | 0220          | 0.915              | 0.22          | 461       | *                                    |
| 25  | 0230          | 0.915              | 0.04          | 486       | *                                    |
| 26  | 0772          | 0.914              | 0.10          | 163       | *                                    |
| 27  | 0924          | 0.912              | 0.06          | 144       | 1152                                 |
| 28  | 0066          | 0.912              | 0.02          | 889       | 0106                                 |
| 29  | 0835          | 0.911              | 0.08          | 1267      | 1037                                 |
| 30  | 0325          | 0.906              | 0.00          | 157       | 0744                                 |
| 31  | 0068          | 0.905              | 0.01          | 616       | *                                    |
| 32  | 0881          | 0.904              | 0.00          | 305       | 1103                                 |
| 33  | 0462          | 0.903              | 0.00          | 93        | 0576                                 |
| 34  | 0228          | 0.899              | 0.09          | 345       | 0866                                 |
| 35  | 0072          | 0.899              | 0.03          | 916       | 0121                                 |
| 36  | 0312          | 0.897              | 0.00          | 188       | 0763                                 |

|    |      |       |      |      |      |
|----|------|-------|------|------|------|
| 37 | 0345 | 0.897 | 0.05 | 631  | *    |
| 38 | 0356 | 0.891 | 0.00 | 85   | *    |
| 39 | 0824 | 0.890 | 0.24 | 242  | 1021 |
| 40 | 0073 | 0.887 | 1.70 | 92   | 0122 |
| 41 | 0379 | 0.886 | 0.10 | 182  | 0663 |
| 42 | 0528 | 0.885 | 0.00 | 199  | 0500 |
| 43 | 0743 | 0.885 | 0.00 | 84   | *    |
| 44 | 0271 | 0.884 | 1.17 | 329  | 0807 |
| 45 | 0434 | 0.881 | 0.00 | 223  | 0601 |
| 46 | 0834 | 0.876 | 0.08 | 782  | 1036 |
| 47 | 0767 | 0.875 | 0.79 | 91   | *    |
| 48 | 0065 | 0.871 | 0.08 | 595  | *    |
| 49 | 0342 | 0.871 | 0.51 | 217  | *    |
| 50 | 0232 | 0.868 | 0.16 | 412  | 0862 |
| 51 | 0062 | 0.867 | 0.04 | 957  | *    |
| 52 | 0096 | 0.864 | 1.29 | 194  | 0147 |
| 53 | 0620 | 0.861 | 0.00 | 97   | 0399 |
| 54 | 0429 | 0.861 | 0.00 | 251  | *    |
| 55 | 0771 | 0.852 | 0.06 | 245  | *    |
| 56 | 0231 | 0.849 | 0.09 | 328  | 0864 |
| 57 | 0508 | 0.843 | 0.18 | 621  | 0525 |
| 58 | 0919 | 0.841 | 2.35 | 120  | 1147 |
| 59 | 0343 | 0.841 | 0.14 | 181  | *    |
| 60 | 0450 | 0.840 | 0.02 | 330  | *    |
| 61 | 0229 | 0.838 | 0.10 | 354  | 0865 |
| 62 | 0309 | 0.837 | 0.06 | 840  | 0767 |
| 63 | 0726 | 0.835 | 0.11 | 214  | *    |
| 64 | 0730 | 0.831 | 0.67 | 165  | *    |
| 65 | 0741 | 0.830 | 0.19 | 114  | *    |
| 66 | 0428 | 0.829 | 0.07 | 290  | 0611 |
| 67 | 0625 | 0.821 | 0.02 | 112  | 0391 |
| 68 | 0926 | 0.820 | 0.06 | 135  | 1154 |
| 69 | 0185 | 0.819 | 0.17 | 271  | 0929 |
| 70 | 0663 | 0.818 | 0.02 | 293  | 0345 |
| 71 | 0736 | 0.814 | 0.60 | 188  | *    |
| 72 | 0445 | 0.812 | 0.07 | 382  | 0593 |
| 73 | 0297 | 0.807 | 0.02 | 1130 | 0778 |
| 74 | 0717 | 0.804 | 2.06 | 226  | *    |
| 75 | 0423 | 0.801 | 0.10 | 257  | *    |

|    |      |       |      |      |      |
|----|------|-------|------|------|------|
| 76 | 0047 | 0.801 | 0.02 | 133  | 0079 |
| 77 | 0748 | 0.797 | 1.75 | 121  | *    |
| 78 | 0186 | 0.794 | 0.10 | 285  | 0929 |
| 79 | 0381 | 0.788 | 0.05 | 184  | 0660 |
| 80 | 0493 | 0.782 | 0.06 | 239  | 0540 |
| 81 | 0239 | 0.778 | 0.14 | 951  | *    |
| 82 | 0142 | 0.776 | 0.03 | 178  | 0986 |
| 83 | 0348 | 0.767 | 1.35 | 535  | *    |
| 84 | 0430 | 0.761 | 0.07 | 183  | *    |
| 85 | 0676 | 0.760 | 0.65 | 229  | 0329 |
| 86 | 0636 | 0.759 | 1.70 | 98   | 0377 |
| 87 | 0122 | 0.756 | 0.03 | 103  | 0181 |
| 88 | 0347 | 0.756 | 0.78 | 354  | 0716 |
| 89 | 0482 | 0.756 | 0.02 | 92   | *    |
| 90 | 0254 | 0.755 | 0.03 | 269  | 0835 |
| 91 | 0739 | 0.748 | 0.02 | 220  | *    |
| 92 | 0253 | 0.739 | 0.05 | 1206 | 0836 |
| 93 | 0174 | 0.729 | 0.03 | 1306 | 0945 |
| 94 | 0725 | 0.728 | 0.03 | 190  | *    |
| 95 | 0723 | 0.728 | 0.46 | 248  | *    |
| 96 | 0727 | 0.714 | 0.02 | 97   | *    |
| 97 | 0119 | 0.712 | 0.20 | 881  | 0176 |
| 98 | 0198 | 0.710 | 0.12 | 381  | 0907 |

---

\* *E.ch.* ortholog not identified.

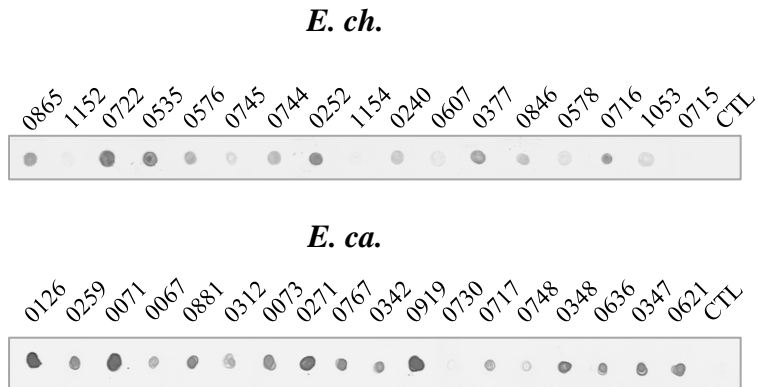

**Supplementary Fig. 1 Expression of *E. ch.* and *E. ca.* hypothetical proteins by IVTT.** Detection of IVTT expression of randomly selected hypothetical proteins of *E. ch.* (upper) and *E. ca.* (bottom) by dot immunoblot with anti-His-tag antibody. CTL, the negative control (IVTT reaction without plasmid template).

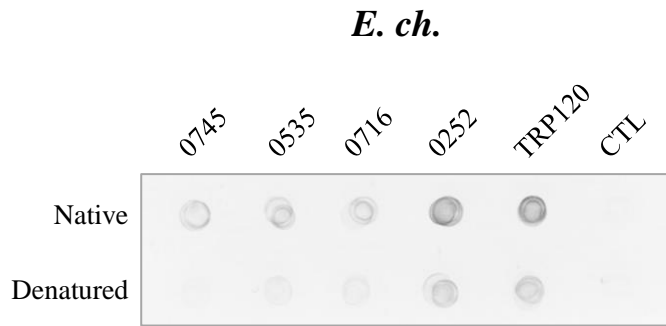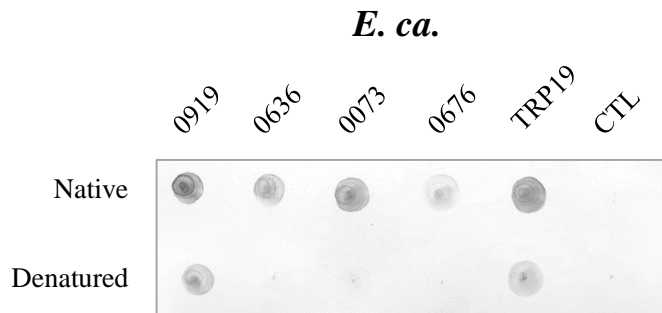

**Supplementary Fig. 2 Conformation-dependent immunoreactivity of *E. ch.* and *E. ca.* hypothetical proteins.** Immunoreactivity of the native and denatured hypothetical proteins and TRPs was detected by dot immunoblot with serum from an HME patient or CME dog. All proteins were IVTT-expressed and purified. CTL, the negative control (IVTT protein with empty plasmid template).



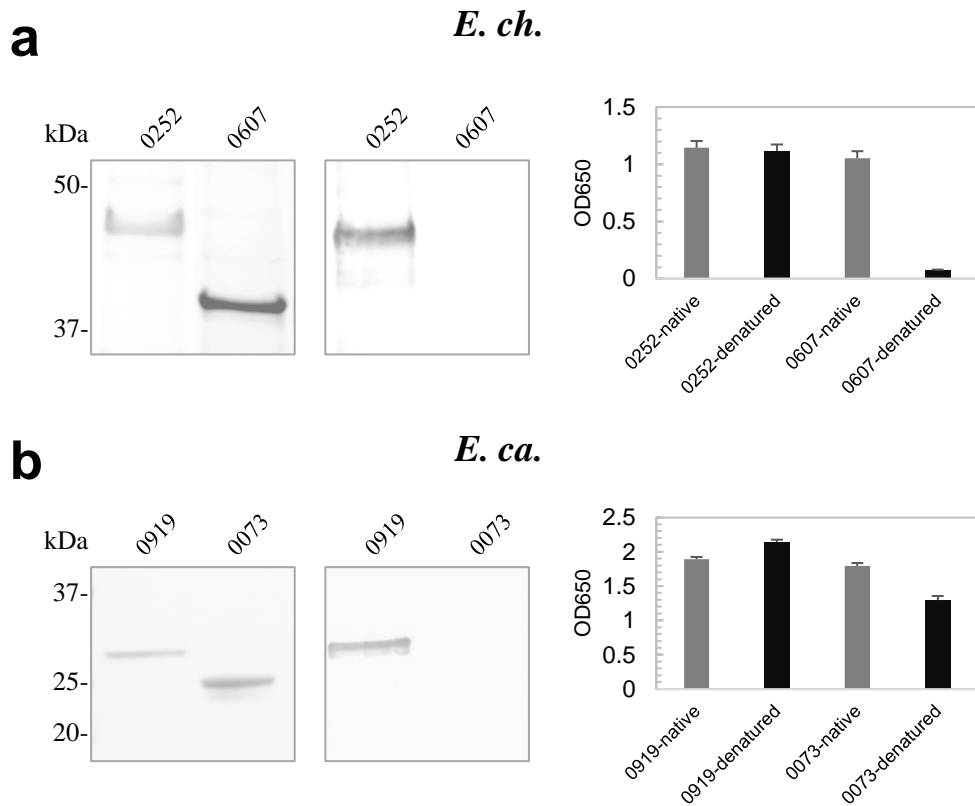

**Supplementary Fig. 3 Conformation-dependent immunoreactivity of *E. coli*-expressed *E. ch.* and *E. ca.* recombinant proteins.** Native and denatured recombinant *E. ch.* (a) and *E. ca.* (b) proteins were expressed in *E. coli* and purified and probed with serum from an HME patient or CME dog and detected by Western immunoblot and ELISA. Left panel, SDS-PAGE of purified recombinant proteins stained with Coomassie blue; middle panel, Western immunoblot; right panel, ELISA OD values. ELISA OD values represent the mean optical density reading from 3 wells ( $\pm$  standard deviations) after background subtraction.
